# Supplementary material for: Zinc Laurate Protects against Intestinal Barrier Dysfunction and Inflammation Induced by ETEC in a Mice Model
Source: MDPI journal article supplement (doi:10.3390/nu15010054), 2022-12-22
Supplement: s1 [file s1]

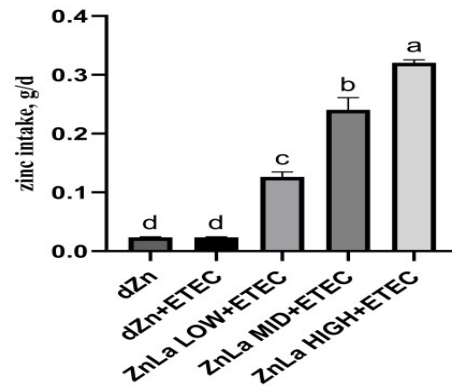

Supplementary Figure S1. Effects of ZnLa on average daily zinc intake in mice. The data were expressed by mean  $\pm$  SEM (n=9), and different lowercase letters in each group showed significant differences ( $P < 0.05$ ).

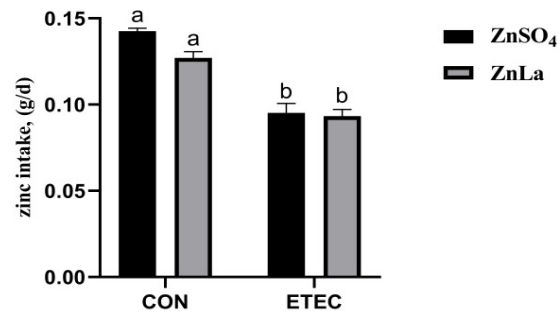

Supplementary Figure S2. Effects of different zinc sources on average daily zinc intake in mice. The data were expressed by mean  $\pm$  SEM (n=9), and different lowercase letters in each group showed significant differences ( $P < 0.05$ ).

Supplementary Table S1. Ingredients and composition of marginal zinc deficient diet.

| Ingredients                          | Unit  |       |
|--------------------------------------|-------|-------|
| Egg White, Spray Dried               | %     | 20.00 |
| Corn starch                          | %     | 15.00 |
| Sucrose                              | %     | 50.26 |
| Cellulose                            | %     | 5.00  |
| Corn oil                             | %     | 5.00  |
| Choline bitartrate                   | %     | 0.2   |
| Vitamin premix*                      |       |       |
| Vitamin A (Acetate)                  | IU/kg | 4000  |
| Vitamin D3 (Cholecalciferol)         | IU/kg | 1000  |
| Vitamin E (Acetate)                  | IU/kg | 750   |
| Vitamin K3 (Menadione)               | mg/kg | 0.75  |
| Vitamin B1 (Thiamine hydrochloride)  | mg/kg | 6.0   |
| Vitamin B2 (Riboflavin)              | mg/kg | 6.0   |
| Vitamin B3 (Nicotinic acid)          | mg/kg | 30    |
| Vitamin B5 (D-Calcium pantothenate)  | mg/kg | 16    |
| Vitamin B6 (Pyridoxine ydrochloride) | mg/kg | 7.0   |
| Vitamin B9 (Folic acid)              | mg/kg | 2.0   |
| Vitamin B12 (Cyanocobalamin)         | mg/kg | 0.025 |
| D-Biotin                             | mg/kg | 0.2   |
| Minerals premix*                     |       |       |
| Ca                                   | g/kg  | 5     |
| P                                    | g/kg  | 1.56  |
| K                                    | g/kg  | 3.6   |
| S                                    | g/kg  | 0.3   |
| Mg                                   | g/kg  | 0.5   |
| Cu                                   | mg/kg | 6.0   |
| Fe                                   | mg/kg | 37    |
| I                                    | mg/kg | 0.2   |
| Mn                                   | mg/kg | 10.5  |
| Se                                   | mg/kg | 0.2   |
| Nutrients content                    |       |       |

|              |       |     |
|--------------|-------|-----|
| Carbohydrate | %     | 66  |
| Fat          | %     | 5.0 |
| Protein      | %     | 20  |
| Zinc levels  | mg/kg | 7.0 |

\*Minerals and vitamins were custom designed by Xietong Shengwu Co. LTD (Nanjing, China) according to AIN-93.

Ca is provided as calcium carbonate; P is provided as potassium phosphate monobasic; K is provided as potassium phosphate monobasic, potassium citrate monohydrate and potassium sulfate; S is provided as potassium sulfate; Mg is provided as magnesium oxide; Cu is provided as copper carbonate; Fe is provided as ferric citrate; I is provided as sodium iodide; Mn is provided as manganese carbonate; Se is provided as Sodium selenide.

Supplementary Table S2. Primer set for real-time RT-PCR analysis

| Gene                           | 5'—3' Primer sequence     |
|--------------------------------|---------------------------|
| <i>Gapdh</i>                   | F:TTGAGGTCAATGAAGGGGTC    |
|                                | R:TCGTCCCGTAGACAAAATGG    |
| <i>Occludin</i>                | F:TGGCAAGCGATCATAACCCAGAG |
|                                | R:CTGCCTGAAGTCATCCACACTC  |
| <i>Claudin-1</i>               | F:TGGCTTCTCTGGGATGGATCGG  |
|                                | R:CCTGAGCGGTACGATGTTGTC   |
| <i>MUC-2</i>                   | F:ATCCTCGACGCCTGTGACCTC   |
|                                | R:GCTGCCCGCTGATGAAGTGAC   |
| <i>ZO-1</i>                    | F:CCATTCAGGTCGCTCGCATGAC  |
|                                | R:CATTGCTGGGCTGCTGTGGAG   |
| <i>IL-1<math>\beta</math></i>  | F:GCAACTGTTCTGAACCTCAACT  |
|                                | R:ATCTTTTGGGGTCCGTCAACT   |
| <i>IL-6</i>                    | F:TAGTCCTTCCTACCCCAATTTCC |
|                                | R:TTGGTCCTTAGCCACTCCTTC   |
| <i>TNF-<math>\alpha</math></i> | F:CCCTCACACTCAGATCATCTTCT |
|                                | R:GCTACGACGTGGGCTACAG     |
| <i>MyD88</i>                   | F:ATCGGCTTAAGTTGTGTGTG    |
|                                | R:AATCGTCAGAAACAACCACC    |
| <i>NF-<math>\kappa</math>B</i> | F:TAACAGCAGGACCCAAGGAC    |
|                                | R:AGCCCCAATACACGCCTCT     |
| <i>TLR-4</i>                   | F:ACCTGGAATGGGAGGACAAT    |
|                                | R:GTCCAAGTTGCCGTTTCTTG    |
| <i>GPR39</i>                   | F:ATACCTGCGTAACCCTGATGG   |
|                                | R:CATGTTCTGAATTTGAGGTGGC  |
| <i>NHE3</i>                    | F:TTGGCCGCCTTCTTATTCTGG   |
|                                | R:TGAAAAGCAGGACAAGGAAATCT |

|             |                          |
|-------------|--------------------------|
| <i>CFTR</i> | F:CTGGACCACACCAATTTTGAGG |
|             | R:GCGTGGATAAGCTGGGGAT    |

Supplementary Table S3. Primer set for virulence factors analysis

| Gene        | 5'–3' Primer sequence       |
|-------------|-----------------------------|
| <i>gapA</i> | F:CGTTAAAGGCGCTAACTTCG      |
|             | R:ACGGTGGTCATCAGACCTTC      |
| <i>eltA</i> | F:TTGGTGATCCGGTGGGAAAC      |
|             | R:AGGAGGTTTCTGCGTTAGGTG     |
| <i>eltB</i> | F:CACGGAGCTCCCCAGACTAT      |
|             | R:GCCTGCCATCGATTCCGTAT      |
| <i>estB</i> | F:TGCCTATGCATCTACACAA       |
|             | R:CTCCAGCAGTACCATCTC        |
| <i>luxS</i> | F:CAGTGCCAGTTCTTCGTTGC      |
|             | R:TGAACGTCTACCAGTGTGGC      |
| <i>bssS</i> | F:TCCCTTCCTGCTCGGACTTA      |
|             | R:CAGACTCATCCGCTCGTAGG      |
| <i>tnaA</i> | F:CGCCAAGAAAGATGCGATGG      |
|             | R:CGTCATACAGACCTACCGCC      |
| <i>motA</i> | F:TGAACGACCCCCATTACAGC      |
|             | R:AGCGGTCACATGAACACCTT      |
| <i>faeG</i> | F:ACTCAGAAAACCTGATGGTGAAACT |
|             | R:CCCCACCTCTCCCTAACACA      |
